# Supplementary material for: Insects and associated arthropods analyzed during medicolegal death investigations in Harris County, Texas, USA: January 2013- April 2016
Source: PubMed Central journal article supplement (PMC5467878; doi:10.1371/journal.pone.0179404), 2017-06-12

# Normality Test Transformed Survey Data

Michelle Sanford

2017-04-06

```
> survey_data <-  
+ readXL("I:/big survey paper/data for analysis of case survey.xlsx",  
+ rownames=FALSE, header=TRUE, na="", sheet="Sheet3", stringsAsFactors=TRUE)
```

```
> survey_data$ln_temperature <- with(survey_data, log(temperature+1))
```

```
> survey_data$ln_RH <- with(survey_data, log(RH+1))
```

```
> survey_data$ln_PMI <- with(survey_data, log(abs_val_PMI+1))
```

```
> with(survey_data, shapiro.test(ln_temperature))
```

Shapiro-wilk normality test

```
data: ln_temperature  
W = 0.91515, p-value = 9.28e-09
```

```
> with(survey_data, shapiro.test(ln_RH))
```

Shapiro-wilk normality test

```
data: ln_RH  
W = 0.96641, p-value = 0.0004134
```

```
> with(survey_data, shapiro.test(ln_PMI))
```

Shapiro-wilk normality test

```
data: ln_PMI  
W = 0.97705, p-value = 0.004886
```

```
> scatterplotMatrix(~ln_PMI+ln_RH+ln_temperature, reg.line=FALSE,  
+ smooth=FALSE, spread=TRUE, span=0.5, ellipse=FALSE, levels=c(.5, .9),  
+ id.n=0, diagonal = 'qqplot', data=survey_data)
```

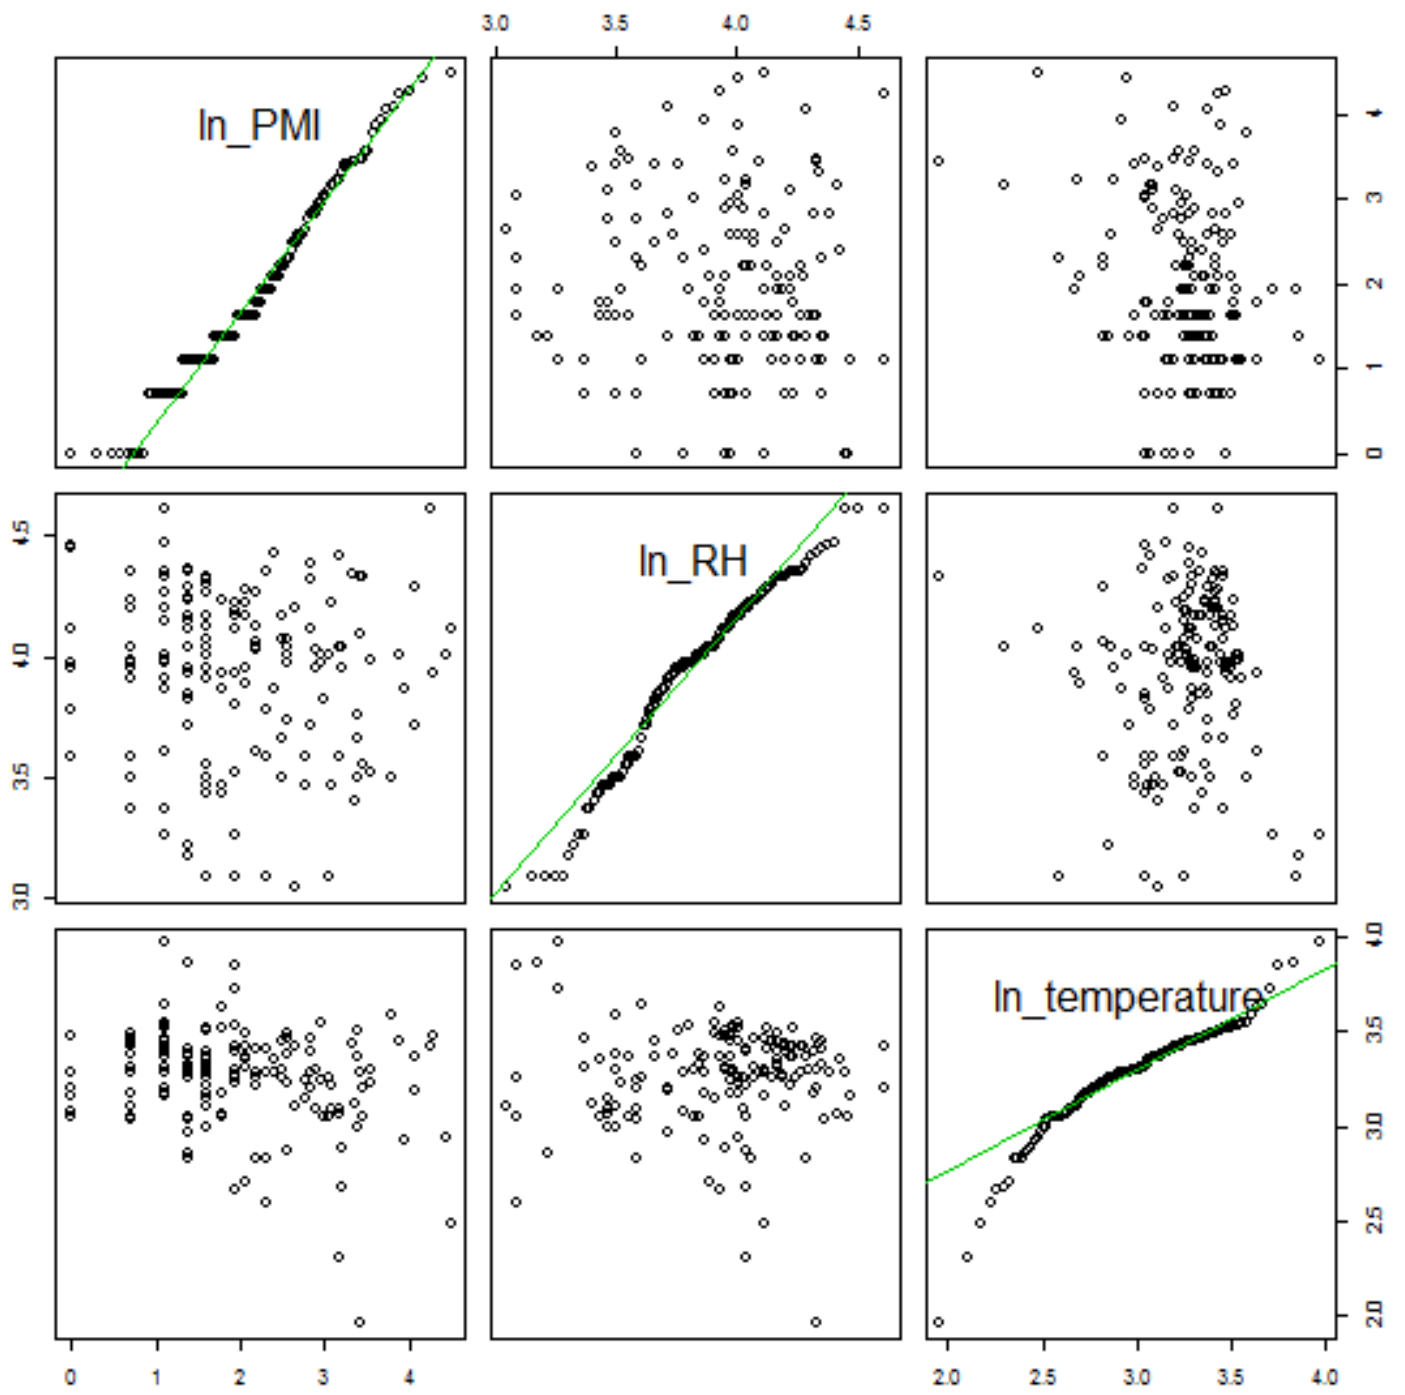

Supplement: pone.0179404.s002.pdf [file pone.0179404.s002.pdf]
