# Supplementary material for: Insects and associated arthropods analyzed during medicolegal death investigations in Harris County, Texas, USA: January 2013- April 2016
Source: PubMed Central journal article supplement (PMC5467878; doi:10.1371/journal.pone.0179404), 2017-06-12
Supplement: pone.0179404.s003.pdf [file pone.0179404.s003.pdf]

# K-W on transformed survey data

Michelle Sanford

2017-04-06

```
> survey_data <- read.table("I:/big survey paper/survey_data.csv",  
+ header=TRUE, sep=",", na.strings="NA", dec=".", strip.white=TRUE)
```

```
> with(survey_data, tapply(ln_temperature, location, median, na.rm=TRUE))
```

```
indoor outdoor  
3.277145 3.397858
```

```
> kruskal.test(ln_temperature ~ location, data=survey_data)
```

Kruskal-wallis rank sum test

```
data: ln_temperature by location  
Kruskal-wallis chi-squared = 6.8397, df = 1, p-value = 0.008916
```

```
> with(survey_data, tapply(ln_temperature, manner, median, na.rm=TRUE))
```

```
accident homicide natural suicide undetermined  
3.373881 3.421000 3.273357 3.202672 3.363842
```

```
> kruskal.test(ln_temperature ~ manner, data=survey_data)
```

Kruskal-wallis rank sum test

```
data: ln_temperature by manner  
Kruskal-wallis chi-squared = 11.708, df = 4, p-value = 0.01966
```

```
> with(survey_data, tapply(ln_temperature, decomp, median, na.rm=TRUE))
```

```
advanced early moderate none skeletal  
3.303217 3.290264 3.277145 3.330767 3.437161
```

```
> kruskal.test(ln_temperature ~ decomp, data=survey_data)
```

```
kruskal-wallis rank sum test
```

```
data: ln_temperature by decomp
```

```
kruskal-wallis chi-squared = 1.9573, df = 4, p-value = 0.7436
```

```
> with(survey_data, tapply(ln_RH, location, median, na.rm=TRUE))
```

```
indoor outdoor  
3.970292 4.025192
```

```
> kruskal.test(ln_RH ~ location, data=survey_data)
```

```
kruskal-wallis rank sum test
```

```
data: ln_RH by location
```

```
kruskal-wallis chi-squared = 2.7817, df = 1, p-value = 0.09534
```

```
> with(survey_data, tapply(ln_RH, manner, median, na.rm=TRUE))
```

```
accident homicide natural suicide undetermined  
3.931826 4.158761 3.951244 3.988813 4.110874
```

```
> kruskal.test(ln_RH ~ manner, data=survey_data)
```

```
kruskal-wallis rank sum test
```

```
data: ln_RH by manner
```

```
kruskal-wallis chi-squared = 13.867, df = 4, p-value = 0.007733
```

```
> with(survey_data, tapply(ln_RH, decomp, median, na.rm=TRUE))
```

```
advanced early moderate none skeletal  
4.043051 3.988813 3.970292 4.060294 4.007333
```

```
> kruskal.test(ln_RH ~ decomp, data=survey_data)
```

```
kruskal-wallis rank sum test
```

```
data: ln_RH by decomp
```

```
kruskal-wallis chi-squared = 3.0391, df = 4, p-value = 0.5513
```

```
> with(survey_data, tapply(ln_TOC, location, median, na.rm=TRUE))
```

```
indoor outdoor  
1.945910 1.386294
```

```
> kruskal.test(ln_TOC ~ location, data=survey_data)
```

```
kruskal-wallis rank sum test
```

```
data: ln_TOC by location
```

```
kruskal-wallis chi-squared = 3.6595, df = 1, p-value = 0.05575
```

```
> with(survey_data, tapply(ln_TOC, manner, median, na.rm=TRUE))
```

```
accident homicide natural suicide undetermined  
1.098612 1.098612 1.945910 2.397895 2.564949
```

```
> kruskal.test(ln_TOC ~ manner, data=survey_data)
```

```
kruskal-wallis rank sum test
```

```
data: ln_TOC by manner
```

```
kruskal-wallis chi-squared = 25.338, df = 4, p-value = 4.302e-05
```

```
> with(survey_data, tapply(ln_TOC, decomp, median, na.rm=TRUE))
```

```
advanced early moderate none skeletal  
2.8332133 1.0986123 1.6094379 0.6931472 3.8162006
```

```
> kruskal.test(ln_TOC ~ decomp, data=survey_data)
```

kruskal-wallis rank sum test

data: ln\_TOC by decomp

kruskal-wallis chi-squared = 71.849, df = 4, p-value = 9.238e-15
